# Supplementary material for: Immunogenicity and safety of COVID-19 vaccination in patients with primary Sjögren’s syndrome
Source: HighWire-hosted journal article supplement (doi:10.1136/rmdopen-2022-002265), 2022-04-01
Supplement: rmdopen-2022-002265supp001_data_supplement.pdf [file rmdopen-2022-002265supp001_data_supplement.pdf]

## **Supplementary material**

### **Immunogenicity and safety of COVID-19 vaccination in patients with primary Sjögren's syndrome**

**Supplementary Table 1** Baseline characteristics of subgroup of pSS patients and HC with blood and/or saliva sample

|                                                  | pSS (n=31)                    | HC (n=11)                    |
|--------------------------------------------------|-------------------------------|------------------------------|
| Gender - female                                  | 27 (87)                       | 11 (100)                     |
| Age                                              | 59 (55-67)*                   | 41 (32-56)*                  |
| <u>Type of vaccine</u>                           |                               |                              |
| Pfizer/BioNtech                                  | 22 (71)                       | 3 (27)                       |
| Moderna                                          | 3 (10)                        | 1 (9)                        |
| AstraZeneca                                      | 6 (19)                        | 3 (27)                       |
| Janssen                                          | 0                             | 4 (36)                       |
| Hydroxychloroquine use                           | 6 (19)                        | n/a                          |
| ESSDAI (total score)                             | 2.0 (1.0-3.3) <sup>b</sup>    | n/a                          |
| ESSDAI <5                                        | 23 (88)                       |                              |
| ESSDAI 5-14                                      | 3 (12)                        |                              |
| ESSDAI ≥14                                       | 0                             |                              |
| Physician GDA                                    | 2.0 (1.0-2.0) <sup>b</sup>    | n/a                          |
| ESSPRI (total score)                             | 6.3 (4.7-7.0)                 | n/a                          |
| Patient GDA                                      | 6.0 (5.0-7.0)                 | n/a                          |
| IgG (g/L)                                        | 13.1 (10.3-15.6) <sup>a</sup> | 10.6 (9.4-12.5) <sup>c</sup> |
| Anti-SSA positive                                | 24 (77%)                      | n/a                          |
| RF positive                                      | 16 (55%) <sup>a</sup>         | n/a                          |
| Available data (n)                               |                               |                              |
| RIVM S1/RBD antibody titers (post-vaccination)   | 28                            | 10                           |
| IFN-γ ELIspot assay (pre- and post-vaccination)  | 24                            | 5                            |
| Anti-SSA antibody titers (pre-vaccination)       | 26                            | n/a                          |
| Anti-SSA antibody titers (post-vaccination)      | 26                            | n/a                          |
| Saliva S1/RBD antibody titers (pre-vaccination)  | 27                            | 9                            |
| Saliva S1/RBD antibody titers (post-vaccination) | 26                            | 9                            |

Data presented as median (IQR) or n (%)

\*Indicates significant difference ( $p < 0.005$ ) between pSS and HC group

<sup>a</sup>1-10%, <sup>b</sup>10-20%, <sup>c</sup>20-30%, <sup>d</sup>30-40% missing data

ESSDAI, Physician GDA and RF collected  $\leq 1$  year before first vaccination date

*Abbreviations:* ELIspot: enzyme-linked immune absorbent assay, ESSDAI: European League Against Rheumatism (EULAR) Sjögren's Syndrome Disease Activity Index, ESSPRI: EULAR Sjögren's Syndrome Patient Reported Index, GDA: global disease activity, HC: healthy controls, IFN: interferon, IgG: immunoglobulin G, n/a: not applicable, pSS: primary Sjögren's syndrome, RBD: receptor binding domain, RIVM: Dutch National Institute for Public Health and the Environment, S1: spike 1

**Supplementary Table 2** Univariate and multivariate linear regression corrected for age to explore the difference in SARS-CoV-2 antibody titers\* between pSS patients and HC for the Pfizer-BioNtech, AstraZeneca and Moderna vaccine types

| <b>PFIZER-BIONTECH</b>                    |                               |                |         |
|-------------------------------------------|-------------------------------|----------------|---------|
|                                           | B-coefficient of pSS/HC group | 95% CI         | P-value |
| Univariate regression                     | 0.114                         | -0.135 – 0.363 | 0.36    |
| Multivariate regression corrected for age | 0.108                         | -0.143 – 0.358 | 0.39    |
| <b>ASTRAZENECA</b>                        |                               |                |         |
|                                           | B-coefficient of pSS/HC group | 95% CI         | P-value |
| Univariate regression                     | -0.017                        | -0.519 – 0.485 | 0.94    |
| Multivariate regression corrected for age | -0.011                        | -0.586 – 0.563 | 0.97    |
| <b>MODERNA</b>                            |                               |                |         |
|                                           | B-coefficient of pSS/HC group | 95% CI         | P-value |
| Univariate regression                     | 0.216                         | -0.124 – 0.556 | 0.19    |
| Multivariate regression corrected for age | 0.205                         | -0.205 – 0.615 | 0.29    |

\*Antibody titers were log-transformed to obtain a normal distribution of residuals

*Abbreviations:* CI: confidence interval, HC: healthy controls, pSS: primary Sjögren's syndrome, SARS-CoV-2: Severe Acute Respiratory Syndrome Coronavirus-2

**Supplementary Table 3** Univariate linear regression to explore the association between baseline characteristics and SARS-CoV-2 antibody titers\* for the Pfizer-BioNTech and AstraZeneca vaccine types in pSS patients

| <b>PFIZER/BIONTECH</b> |                         |         |
|------------------------|-------------------------|---------|
|                        | B-coefficient (95% CI)  | P-value |
| Hydroxychloroquine use | -0.167 (-0.465 – 0.131) | 0.27    |
| ESSDAI                 | -0.007 (-0.060 – 0.045) | 0.77    |
| IgG                    | -0.006 (-0.026 – 0.014) | 0.55    |
| Lymphocyte count       | 0.175 (-0.126– 0.476)   | 0.25    |
| <b>ASTRAZENECA</b>     |                         |         |
|                        | B-coefficient (95% CI)  | P-value |
| Hydroxychloroquine use | 0.565 (-0.034 – 1.163)  | 0.06    |
| ESSDAI                 | -0.077 (-0.236 – 0.083) | 0.31    |
| IgG                    | -0.030 (-0.099 – 0.039) | 0.33    |
| Lymphocyte count       | -0.248 (-0.588 – 0.092) | 0.13    |

\*Antibody titers were log-transformed to obtain a normal distribution of residuals

ESSDAI and lymphocyte count collected  $\leq 1$  year before first vaccination date

*Abbreviations:* CI: confidence interval, ESSDAI: European League Against Rheumatism (EULAR) Sjögren's Syndrome Disease Activity Index, HC: healthy controls, IgG: immunoglobulin G pSS: primary Sjögren's syndrome, SARS-CoV-2: Severe Acute Respiratory Syndrome Coronavirus-2

**Supplementary Table 4** Correlation coefficients of T-cell response as measured with spike-specific IFN- $\gamma$  producing SFCs with RIVM SARS-CoV-2 antibody titers (7 days after 2<sup>nd</sup> vaccination)

| <b>TOTAL GROUP (pSS+HC)</b>        | R     | p-value |
|------------------------------------|-------|---------|
| Anti-S1 IgG antibody titer (n=29)  | 0.451 | 0.01    |
| Anti-RBD IgG antibody titer (n=29) | 0.456 | 0.01    |
| <b>pSS</b>                         |       |         |
| Anti-S1 IgG antibody titer (n=24)  | 0.452 | 0.03    |
| Anti-RBD IgG antibody titer (n=24) | 0.451 | 0.03    |

*Abbreviations:* HC: healthy controls, IFN: interferon, IgG: Immunoglobulin G, pSS: primary Sjögren's syndrome, RBD: receptor binding domain, RIVM: Dutch National Institute for Public Health and the Environment, SARS-CoV-2: Severe Acute Respiratory Syndrome Coronavirus-2, S1: spike 1, SFC: spot-forming cell,

**Supplementary Table 5** Change in patient-reported and systemic disease activity and IgG levels in pSS patients after vaccination, split for Pfizer-BioNtech, AstraZeneca and Moderna vaccine types

| <b>PFIZER-BIONTECH</b> | <b>Baseline</b>         | <b>After vaccination</b> | <b>p-value</b> |
|------------------------|-------------------------|--------------------------|----------------|
| ESSPRI – total         | 6.0 (4.7-7.0) (n=47)    | 5.7 (3.8-6.8) (n=45)     | 0.22           |
| ESSPRI – dryness       | 7.0 (4.0-7.0) (n=47)    | 6.0 (4.0-7.0) (n=46)     | 0.08           |
| ESSPRI – fatigue       | 6.0 (4.0-8.0) (n=47)    | 6.5 (4.0-7.0) (n=46)     | 0.92           |
| ESSPRI – pain          | 6.0 (4.0-7.0) (n=47)    | 5.0 (2.5-7.0) (n=45)     | 0.49           |
| Patient GDA            | 6.0 (5.0-7.0) (n=47)    | 6.0 (4.0-7.0) (n=46)     | 0.33           |
| ESSDAI                 | 3.0 (1.0-4.8) (n=40)    | 3.0 (1.0-5.0) (n=23)     | 0.83           |
| IgG                    | 13.5 (10.3-19.0) (n=46) | 13.0 (10.6-18.3) (n=45)  | 0.38           |
| <b>ASTRAZENECA</b>     |                         |                          |                |
| ESSPRI – total         | 6.0 (5.0-7.5) (n=13)    | 5.0 (3.8-6.5) (n=12)     | 0.28           |
| ESSPRI – dryness       | 7.0 (5.0-8.0) (n=13)    | 5.0 (4.5-7.5) (n=13)     | 0.25           |
| ESSPRI – fatigue       | 6.0 (5.0-8.0) (n=13)    | 7.0 (4.3-7.8) (n=12)     | 1.00           |
| ESSPRI – pain          | 7.0 (5.0-7.5) (n=13)    | 5.0 (3.0-6.5) (n=13)     | 0.30           |
| Patient GDA            | 7.0 (5.5-8.0) (n=13)    | 6.0 (4.0-7.5) (n=13)     | 0.12           |
| ESSDAI                 | 3.0 (2.0-4.5) (n=13)    | 2.0 (1.5-4.3) (n=10)     | 0.66           |
| IgG                    | 12.1 (9.4-15.6) (n=10)  | 12.4 (7.9-13.4) (n=11)   | 0.74           |
| <b>MODERNA</b>         |                         |                          |                |
| ESSPRI – total         | 7.0 (5.6-8.0) (n=6)     | 8.2 (5.2-8.5) (n=6)      | 0.59           |
| ESSPRI – dryness       | 7.5 (5.8-8.0) (n=6)     | 7.5 (5.8-9.0) (n=6)      | 0.78           |
| ESSPRI – fatigue       | 6.5 (4.8-8.0) (n=6)     | 7.5 (5.8-9.0) (n=6)      | 0.44           |
| ESSPRI – pain          | 8.0 (6.3-8.0) (n=6)     | 8.0 (4.5-9.3) (n=6)      | 0.88           |
| Patient GDA            | 6.5 (5.5-8.0) (n=6)     | 7.0 (5.3-8.3) (n=6)      | 1.00           |
| ESSDAI                 | 2.0 (0.0-3.5) (n=5)     | 2.5 (-) (n=2)            | 1.00           |
| IgG                    | 11.2 (10.3-14.9) (n=6)  | 11.0 (9.3-18.8) (n=6)    | 0.56           |

Data presented as median (IQR).

Baseline ESSDAI was collected within 1 year before the first vaccination and follow-up ESSDAI was collected within 6 months after vaccination

ESSPRI, patient GDA and IgG scores were collected at baseline and 28 days after the second vaccination

*Abbreviations:* ESSDAI: European League Against Rheumatism (EULAR) Sjögren's Syndrome Disease Activity Index, ESSPRI: EULAR Sjögren's Syndrome Patient Reported Index, GDA: global disease activity, IgG: immunoglobulin G, pSS: primary Sjögren's syndrome

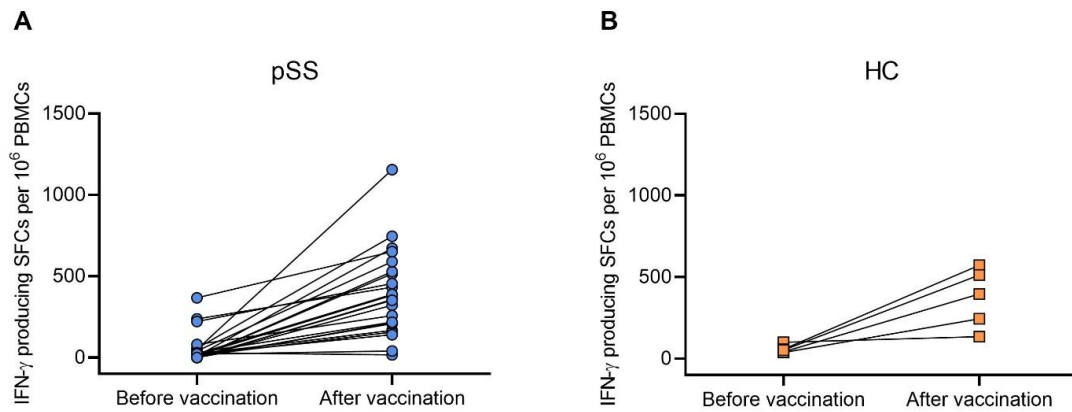

**Supplementary Figure 1** Change in IFN- $\gamma$  producing SFCs before and after vaccination in **A)** pSS patients and **B)** healthy controls

*Abbreviations:* HC: healthy controls, IFN: interferon, PBMC: peripheral blood mononuclear cell, pSS: primary Sjögren's syndrome, SFC: spot-forming cell

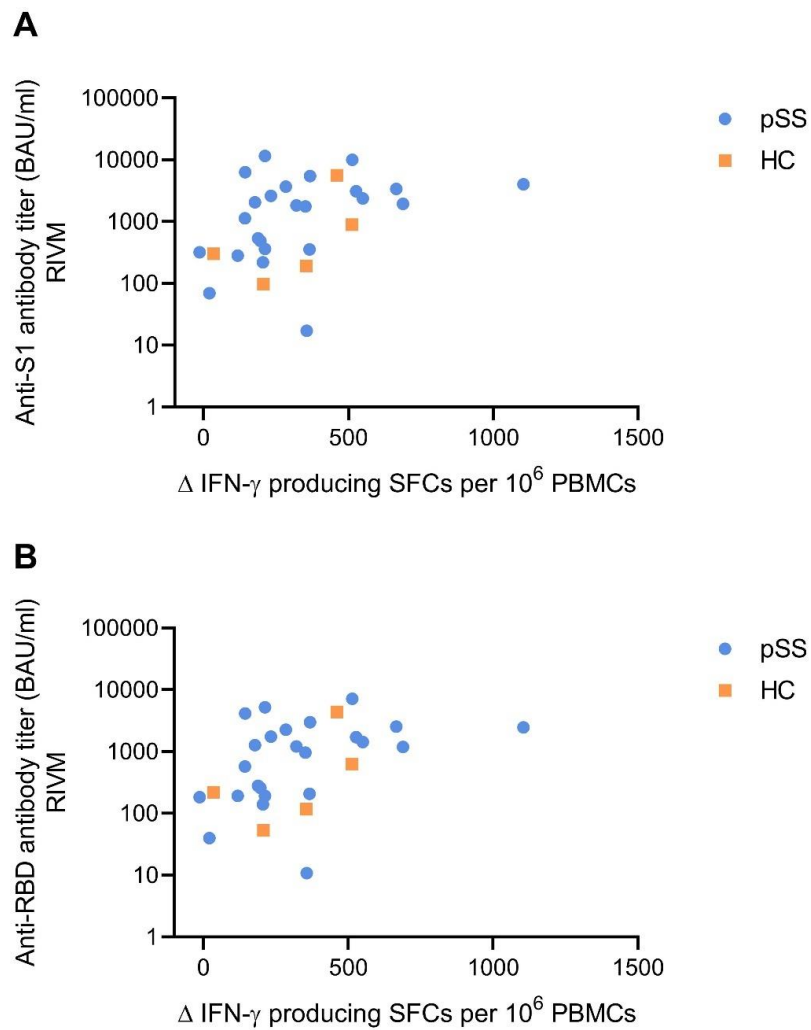

**Supplementary Figure 2** Scatterplots of IFN- $\gamma$  producing SFCs with **A)** anti-S1 antibody titers in RIVM blood samples (+7 days after second vaccination) **B)** anti-RBD antibody titers in RIVM blood samples (+7 days after second vaccination)

*Abbreviations:* HC: healthy controls, IFN: interferon, RIVM: Dutch National Institute for Public Health and the Environment, PBMC: peripheral blood mononuclear cell, pSS: primary Sjögren's syndrome, RBD: receptor binding domain, S1: spike 1, SFC: spot-forming cell



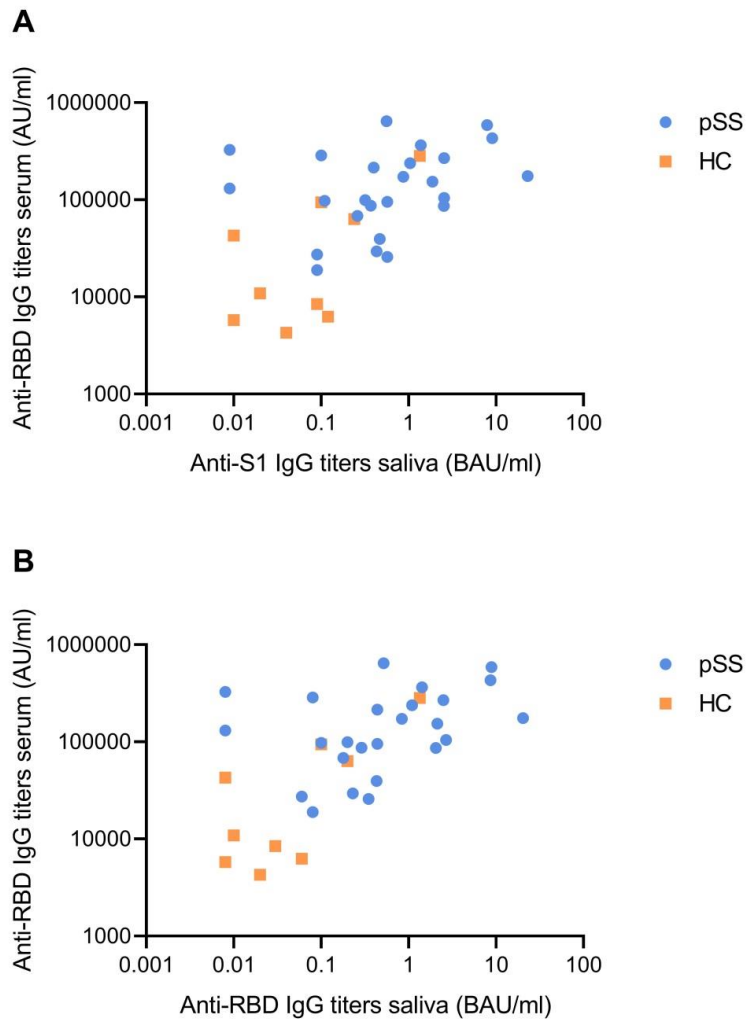

**Supplementary Figure 3** Scatterplots of anti-RBD IgG titers in serum and **A**) anti-S1 IgG titers in saliva and **B**) anti-RBD IgG titers in saliva for patients with primary Sjögren's syndrome (pSS) and healthy controls (HC)

*Abbreviations:* HC: healthy controls, IgG: Immunoglobulin G, pSS: primary Sjögren's syndrome, RBD: receptor binding domain, S1: spike 1

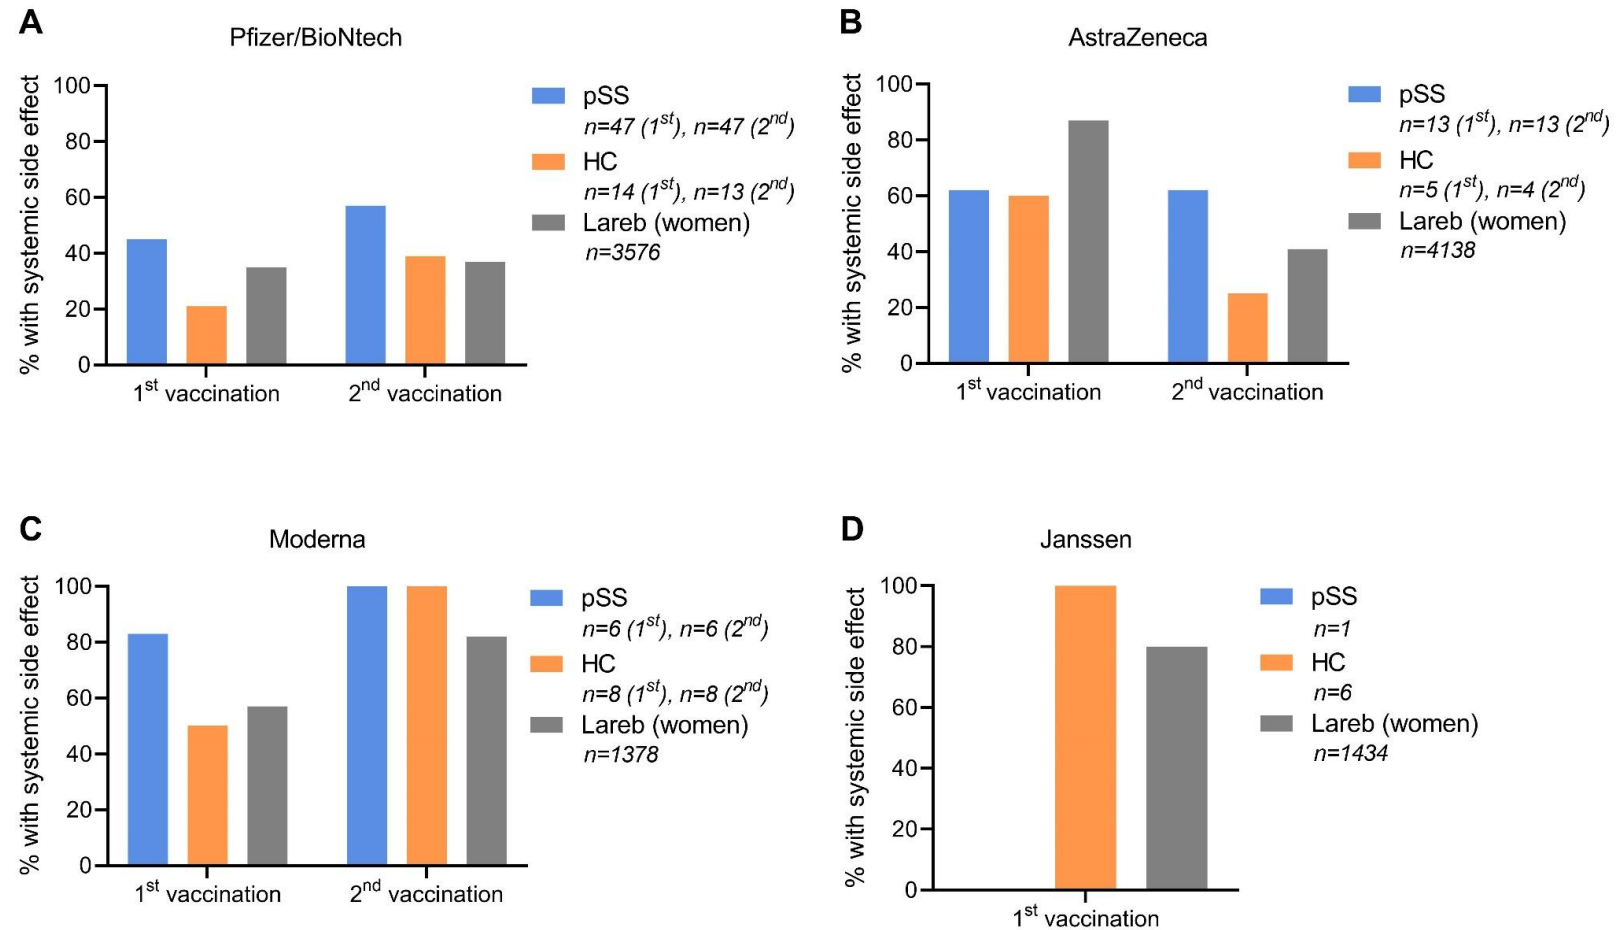

**Supplementary Figure 4** Systemic side effects after the 1st and 2nd vaccination for participants who received **A)** Pfizer-BioNtech **B)** AstraZeneca **C)** Moderna or **D)** Janssen

Abbreviations: HC: healthy controls, pSS: primary Sjögren's syndrome
